# Supplementary material
Source: PubMed Central journal article supplement (PMC5650531)

Supplementary Material:

List of supplementary Material:

Four supplemental figures, two supplemental tables

1. Figure S1. PIP strips. Associated with Figure 5. Shows that CCCP-1 is capable of binding to a number of different phospholipids with only weak binding specificity.
2. Figure S2. SEC of CCCP-1 fragments. Associated with Figure 6. Shows which domains of CCCP-1 are responsible for its large apparent molecular mass.
3. Figure S3. Alignment of CCCP-1. Shows that CC3 is the most conserved region of the protein.
4. Figure S4. Validation of CCCP1 antibody. Shows that the CCCP1 antibody recognizes CCCP1 in 832/13 cells.

Table S1. List of worm strains.

Table S2. List of plasmids.

## Supplementary Figure Legends

FIGURE S1. **CCCP-1 binds to phosphatidylinositol lipids with a single phosphate group.** A, Equimolar amounts of GST-CCCP-1 or GST were incubated with membranes coated with different membrane phospholipids (PIP strips). Binding activity was detected using an antibody to the GST tag. PI(4,5)P2 Grip, a GST-tagged PLC- $\delta$ 1-PH domain protein, was used as a positive control. LPA: lysophosphatidic acid, LPC: lysophosphocholine, PI: phosphatidylinositol, PI(3)P: phosphatidylinositol (3) phosphate, PI(4)P: phosphatidylinositol (4) phosphate, PI(5)P: phosphatidylinositol (5) phosphate, PE: phosphatidylethanolamine, PC: phosphatidylcholine, S1P: sphingosine 1-phosphate, PI(3,4)P2: phosphatidylinositol (3,4) bisphosphate, PI(3,5)P2: phosphatidylinositol (3,5) bisphosphate, PI(4,5)P2: phosphatidylinositol (4,5) bisphosphate, PI(3,4,5)P3: phosphatidylinositol (3,4,5) trisphosphate, PA: phosphatidic acid, and PS: phosphatidylserine. B, CCCP-1 does not show obvious binding selectivity between phosphatidylinositol lipids. Equimolar amounts of GST-CCCP-1 or GST were incubated with membranes coated with different phosphatidylinositols of decreasing concentration (PIP arrays). Binding activity was detected using an antibody to the GST tag.

FIGURE S2. **The central CC2 domain is responsible for the large apparent molecular mass of CCCP-1.** Fractionation of CCCP-1 fragments by gel filtration on a Superose 6 column for large fragments (top) or Superdex 200 column for smaller fragments (bottom). 1 mL fractions were collected and analyzed by Western blot against the His<sub>6</sub> tag. IB: immunoblot.

FIGURE S3. **Alignment of the CCCP-1 protein.** Alignment of CCCP-1 proteins from *Capsaspora owczarzewski* (Capsaspora, CAOG\_00459, accession # XP\_004365330.2), *Monosiga brevicollis* (Choano, hypothetical protein, accession # XP\_001745351.1), *Drosophila melanogaster* (Fly, golgin 104, accession # NP\_648879.1), *Takifugu rubripes* (Fugu, Ccdc186, XP\_011604585.1), *Homo sapiens* (Human, Ccdc186, accession # AAI03500.1), *Hydra vulgaris* (Hydra, Ccdc186-like, XP\_012558241.1), *Rattus norvegicus* (Rat, Ccdc186, accession # KX954625), *Amphimedon queenslandica* (Sponge, Ccdc186-like, XP\_011409991.1), *C. elegans* (Worm, CCCP-1b, accession # NP\_499628.1). Identical residues are shaded in black and similar residues are shaded in grey. Alignment was made with T-Coffee<sup>1</sup>, <http://www.ebi.ac.uk/Tools/msa/tcoffee/>, using default parameters and exhibited with BoxShade 3.21 ([http://embnet.vital-it.ch/software/BOX\\_form.html](http://embnet.vital-it.ch/software/BOX_form.html)). The coiled-coil domains of the worm protein (from SMART<sup>2</sup>, <http://smart.embl-heidelberg.de>) are marked with blue bars. The CC3 domain of worm CCCP-1 is marked with a red bar. The presence of potential amphipathic helices in the CC3 domain was determined using the following settings in HeliQuest<sup>3</sup> (<http://heliquet.ipmc.cnrs.fr>): Helix type:  $\alpha$ , window size: 18 amino acids, Hydrophobic moment ( $\mu$ H) peaks above 0.35. The predicted helices with a patch of five or more hydrophobic amino acids are numbered 1, 2 and 3. In the human ortholog, the region of helices #1 and #2 is still predicted to form amphipathic helices, but the region of helix #3 is not predicted to form an amphipathic helix.

FIGURE S4. **Validation of CCCP1 antibody.** Representative confocal image of 832/13 cells overexpressing CCCP1::GFP and costained with CCCP1 and GFP antibodies. The two signals are almost perfectly colocalized. Scale bar: 5  $\mu$ m

1. Notredame C, Higgins DG, Heringa J. T-Coffee: A novel method for fast and accurate multiple sequence alignment. *J Mol Biol.* 2000;302(1):205-217.
2. Schultz J, Milpetz F, Bork P, Ponting CP. SMART, a simple modular architecture research tool: Identification of signaling domains. *Proc Natl Acad Sci.* 1998;95(11):5857-5864.
3. Gautier R, Douguet D, Antony B, Drin G. HELIQUEST: a web server to screen sequences with specific  $\alpha$ -helical properties. *Bioinformatics.* 2008;24(18):2101-2102.

## Table S1— Strain list

EG334 *cccp-1(ox334) III*  
EG5627 *rab-2(nu415) I*  
XZ1804 *yakEx101[Prab-3::cccp-1 cDNA::eGFP, Pmyo-3::mcherry]*  
XZ1808 *yakEx99[Prab-3::CC2+3 cDNA::eGFP, Pmyo-3::mcherry]*  
XZ1803 *yakEx100[Prab-3::CC3 cDNA::eGFP, Pmyo-3::mcherry]*  
XZ1801 *yakEx98[Prab-3::CC1+2 cDNA::eGFP, Pmyo-3::mcherry]*  
XZ1813 *rab-2(nu415) I; yakEx101[Prab-3::cccp-1 cDNA::eGFP, Pmyo-3::mcherry]*  
XZ1812 *rab-2(nu415) I; yakEx99[Prab-3::CC2+3 cDNA::eGFP, Pmyo-3::mcherry]*  
XZ1810 *rab-2(nu415) I; yakEx100[Prab-3::CC3 cDNA::eGFP, Pmyo-3::mcherry]*

XZ1809 *rab-2(nu415) I; yakEx98[Prab-3::CC1+2 cDNA::eGFP, Pmyo-3::mcherry]*  
XZ1877 *oxls602[cb-unc-119(+), Pcccp-1::cccp-1 cDNA::eGFP] II ; cccp-1(ox334) III*  
XZ1807 *yakSi21[Pcccp-1::CC1+2 cDNA::eGFP, cb-unc-119(+)] II ; cccp-1(ox334) III*  
XZ1893 *yakSi23[Pcccp-1::CC2+3 cDNA::eGFP, cb-unc-119(+)] II ; cccp-1(ox334) III*  
XZ1897 *yakSi25[Pcccp-1::CC3 cDNA::eGFP, cb-unc-119(+)] II ; cccp-1(ox334) III*  
XZ2068 *yakEx132[Prab-3::cccp-1 cDNA::eGFP, Punc-129::tagRFP::rab-2, Pmyo-2::mcherry]*  
XZ2070 *yakEx134[Prab-3::CC3 cDNA::eGFP, Punc-129::tagRFP::rab-2, Pmyo-2::mcherry]*

## Table S2—Plasmid list

### C. elegans vectors

pMA59 *Prab-3::cccp-1 cDNA::eGFP* in pCFJ150  
pJC200 *Prab-3::CC2+3 cDNA::eGFP* in pCFJ150  
pJC201 *Prab-3::CC1+2 cDNA::eGFP* in pCFJ150  
pJC198 *Prab-3::CC3 cDNA::eGFP* in pCFJ150  
pMA58 *Pcccp-1::cccp-1 cDNA::eGFP* in pCFJ150  
pJC187 *Pcccp-1::CC2+3 cDNA::eGFP* in pCFJ150  
pJC188 *Pcccp-1::CC1+2 cDNA::eGFP* in pCFJ150  
pJC193 *Pcccp-1::CC3 cDNA::eGFP* in pCFJ150  
pMA160 *Punc-129::tagRFP::rab-2* in pCFJ150

### Bacterial expression vectors

pGST parallel  
pHIS parallel  
pJC121 His<sub>6</sub>-CCCP-1 in pHIS parallel  
pJC158 His<sub>6</sub>-CC1 in pHIS parallel  
pJC159 His<sub>6</sub>-CC1+2 in pHIS parallel  
pJC160 His<sub>6</sub>-CC3 in pHIS parallel  
pJC161 His<sub>6</sub>-CC2+3 in pHIS parallel  
pJC190 His<sub>6</sub>-CC2 in pHIS parallel  
pJC164 GST-CCCP-1 in pGST parallel  
pJC116 GST-RAB-2  
pRK793 TEV protease S219V

### Mammalian cell expression vectors

pET50 CCCP1::GFP (rat cDNA) in pEGFP-N1  
pET159 CC1+2::GFP (rat cDNA) in pEGFP-N1  
pJC218 CC3::GFP (rat cDNA) in pEGFP-N1

**Figure S1**

**A**

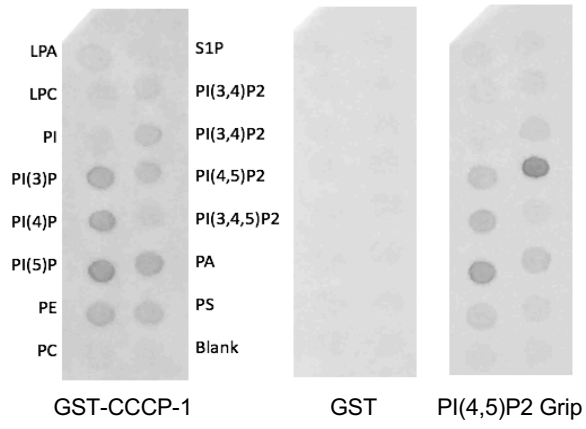

**B**

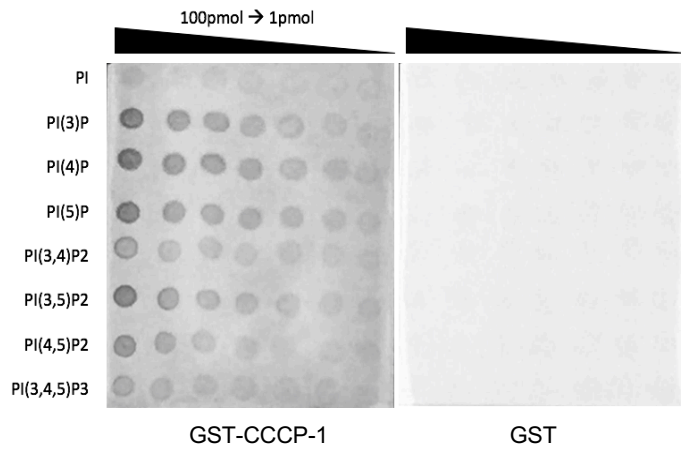

**Figure S2**

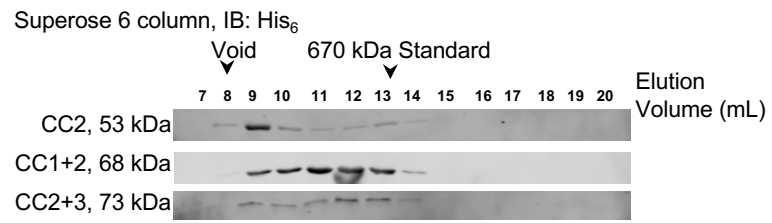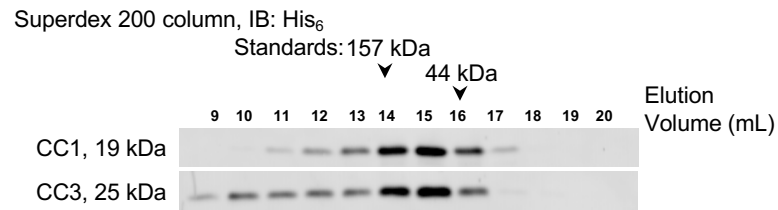

Figure S3

```

Capsaspora      1 MADLTI-----ASSAA-----
Choano          1 MDEDDD-----LLAELEA-----
Fly             1 MESAQATP-----PA-----
Fugu            1 MDPVSYSPTE--GSEGESLSKGSQDGRSANSPLNTEEEQQVCHNDQEEAEKCCQAHGTS
Human           1 MSETD-----
Hydra           1 MESFCSASDSE--LLEEYLK-----
Rat             1 MKIRSRFEEMQSELVAVS-----
Sponge          1 MMAEE-----EESIT-----
Worm            1 MEEDVV-----ESCEA-----

Capsaspora      12 -----SSDPAATSAATAL-TTDAAGAVAA-----
Choano          14 -----ELESAPDTGPDARA--DETSLATQAAMAA-----
Fly             11 -----EMENPASVEN-GDSG-RDSNHIEGKAIGD-----
Fugu            60 QALSEVMKTD2DIQTDTEVQTC-SQEQARDELHTDVISDEAFSTEGEKPSLSIQTDAA
Human           6 -----HIASTSSDKNVG-KTPELKEDSCNLFSGNESSKLENESKLLSLNTDKT
Hydra           19 -----KVQTELVVNDQNHIVTKKNLYEQGNINIQ-----
Rat             19 -----M-SE2EHIASISSDATTG-TTSELKDDSRISVSGDESSRLETGSELLSLNPDRV
Sponge          12 -----2GTNGVC-----L-KETGTGNGGSGNGL-----
Worm            12 -----2PTN-----STYG-TP-----

Capsaspora      39 -----PPSSSSS---SAA-----
Choano          41 -----IPQSGVSTEEFIRLQIQR-----QRA
Fly             38 -----VDMKADSIEQQLE-----
Fugu            119 SATPVDEV--VESSP-SVLEG-TLTFDDVKDSCAIHPSTDEHPFDLAADCTAAAPPHEDES
Human           53 LCQPNEHNNRIEAQENY----IPDHGGGEDSCAKTDIGS-----ENS
Hydra           49 -----
Rat             71 LCQTTEQCSQNEVQEDDVQEGRTPDCGSAEHSCAETDTCP-----EHS
Sponge          33 -----VNNGGTVNDPGVE-----
Worm            22 -----

Capsaspora      49 -----SSA-----SS2EP-----APPO2S2DASASA-SAATPAAPAARPNT---
Choano          62 EGTNNRSSR-----RS2MLGNMFR--GRSQ2NASVSE--SPAPSVKAVPPAE---
Fly             51 -----ESD-VK-----TE
Fugu            175 ASTVSPPSVQCGSEHSPTDSTT-TSGISNGLSTPSS2D-TVGSSPASSPQTSANTPVPLNS
Human           91 EQIANFPPSGNFAKHISKTN-2ET-EQKVTQILVELRSS-TFPE--SANEK-----TY
Hydra           49 -----TDFQVNG-----S-----
Rat             114 EQMDDCPGGNFAKPVSHTS-2EP-GHMVTQRLAEFKSS-APTE--AGDPK-----TT
Sponge          46 -----QEA-----DK2E-----G-----GTV-----
Worm            22 -----VRVASPLIHNEED-VIPT--TAVEN-----

Capsaspora      81 -----MTISIDEFAMMQHE2LVSLKTAK-YEF--AE-----
Choano          106 -----LEA--KD-----
Fly             58 SNGDQLTDQDEGKI--EQDLKAAVLEQVPI2EE2GLSLRF-----
Fugu            233 LSSPYDTCRKLMSQIQRSLSQESLLDELE2SELLACQLPAGVKSPTANGLAADQEGCVV
Human           137 SESPYDTCRKFISKIKSVSASEDLLEEIE2SELLSTEF AE-HRV--PNGMN-KGEHALV
Hydra           57 -----DSVSENLDIKKNI2EVN--LKILAEF-----
Rat             160 SASLYDTCRKLISKIKTVSASDLLGEIE2SELLSAELAEHQV--PNGVN-KGEHALA
Sponge          57 -----SY-----
Worm            44 -----S-----

Capsaspora      108 -----KEKR2VIG2OLAQ-----LEE2-QQIKDKKVKVAD2LA2EKTQ2KKR2DTLTD-----
Choano          111 -----KEIEK2LK2Q2RAQ-----QLEE-EVGLHKES-----KDQLLR-----
Fly             95 -----KDL2Q2AQEK-----VKE2Q2-QTPS-QPPQND2LSH-----
Fugu            293 VFER2CVQYN2VAQ2Q2EKA-----IQRI2LEENKRHQ2ELILG2TCSEK2DGMREE2LKKRTETE2KQH-
Human           193 LFER2CVQDK2YL2Q2Q2EHI-----IKK2L2IKENKKHQ2ELFVD2TCSEK2DN2IREE2LKKRTETE2KQH-
Hydra           80 ---KFLKEK2VS2OLENHVQLK2VQDFOLKTLEYE2TIQR2KTENIS2IVTQ2VNTEEFTE2KEST
Rat             217 LFER2CVHSR2YL2Q2Q2E2L2T-----IQ2Q2L2IKENKNHQ2ELILN2TCSEK2DN2IREE2LKKRTETE2KLH-
Sponge          59 -----EMYKTVLDERD2Q2LSL2LK2DIKQ2Q2DSF-----
Worm            45 LYS2KCN-----AV2Q2E2Q2E-----FER2ESQNAEYRE2KLLRTIRERDL-NEE2LK2KNV--Q2NQH-

```

Capsaspora 152 -----DFRNMDTELKKIRPESKANKTKID-ETLAAALTREQQAHTQAADKLSKLETHAAT  
 Choano 140 -----QVKALQOLDLDDQRRVYKRSMAAINEKNSSLQAEIKR-----  
 Fly 122 ---VHCLAQLE---EQRNRYEQQLEQIRTSNVQKDNMITL-----  
 Fugu 348 ---MSSIKKLEGRVEELKELKESRDKLIQQDHAASALQM-----  
 Human 248 ---MNTIKOLESRIEELNKEVKASRDKLIAQDVTAKNAVQQ-----  
 Hydra 137 QILKKTIELEKELLQKCIKNDTIDKLSAHDAAKRAISI-----  
 Rat 272 ---MNTIKOLESRIEELNKEVKASKDQIQAQDVTAKNAIQ-----  
 Sponge 86 ---QAIARKLEVKCLSQQEEEMEELEERLQKE---KNTTTS-----  
 Worm 93 ---KKELDAQVRRIRLELVQLKTTTDRGLAQEAHFNVTTKE-----

Capsaspora 206 AKQAATLQSALEQERLEKRALMAGSGTQATAALVDGAASSADAPSGDSTAAASAPSAAGN  
 Choano 176 -----  
 Fly 156 -----  
 Fugu 386 -----  
 Human 286 -----  
 Hydra 178 -----  
 Rat 310 -----  
 Sponge 120 -----  
 Worm 131 -----

Capsaspora 266 ADGSTASGGAVAELVLR--EMEQLRKSLEEARAAKDGLQADLDARQTEYAAAQALSKTSS  
 Choano 176 -----LQONNVH--LEE---MAR-----  
 Fly 156 -----IQRENAILGKEKQACRKEEMEMANKEKEATVIKFKAMKEKL-----  
 Fugu 386 -----MQKEMTF--RLEQ--ANKKCEARQEKEAMVMKYVRGEKE-----  
 Human 286 -----LHKEMAQ--RMEQ--ANKKCEEARQEKEAMVMKYVRGEKE-----  
 Hydra 178 -----MQKENST--KIDQ--ITKMYDDCQKEKEDLNKISKVDE-----  
 Rat 310 -----IHKEMAQ--RMDQ--ANKKCEARQEKEAMVMKYVRGEKE-----  
 Sponge 120 -----LQEEELNK--KITE---LSQAIKNEETVMDRLSSLDQE-----  
 Worm 131 -----MSQKFNL--ALQQL--ATKKAEQCDKEKNEAVVKYAMREGE-----

Capsaspora 323 QASETELA-----ALRATNEKQQKELAEIREAKESLETSEGELVAQTMRLSERV  
 Choano 190 -----  
 Fly 195 -----LI-----DAKKEKEAVEK---QIAEAKKEVKNVSTRFLA---VSEERK  
 Fugu 422 -----AL-----DLRRDKEGLEK---RLREATKEVDRQALRGNQ---LAQDK  
 Human 322 -----SL-----DLRKEKETLER---KLRDANKELEKNTNKIKQ---LSQEK  
 Hydra 214 -----YIISKLESIIEDLQKCSVLQIK---KTAGOSQEVKLRGQLKS---KESDL  
 Rat 346 -----AL-----DLRKEKETLER---KLRDASKELEKNTNKIKQ---LSQEK  
 Sponge 152 -----RM-----KLLDEQVTLER---KTKELNRELEKAQAVVKN---QKVEL  
 Worm 167 -----MM-----KLRDEISKKDS---NMKVIKEELEAAR-----K

Capsaspora 372 AGLDDKCATSVAECQTLTKTVADLTASLKQKTDEHEAATTOVKWMQTRLOSEVEAEDQVK  
 Choano 190 -----EETSSDHMKPTQGGQTAS-----DSA  
 Fly 231 SRMTY-----IIDEKCNEVRKYORECEKYKTEMGHLESKLYHINKLNIETEAKAVE  
 Fugu 458 GRLLQQ-----LCDTKEAEVNRITREVEKMKEDTNSHLIKVQWAKLQKSEVDTHKTK  
 Human 358 GRLLHQ-----LYETKEGETTRLIREIDKLKEDINSHVIKVKWAKLQKAEVDSHETK  
 Hydra 261 TKLTT-----INENLENQVSKLNKKIDQKQEIDGYETKINWAKLQKTELEAKDSK  
 Rat 382 GRLLQQ-----LYESKEGETTRLARETEKLKEEMNSHIKVKWAKLQKAEVDSHETK  
 Sponge 188 TKLKT-----ANDKQETSLSSETTRELSKLEETSLSIKLQWAKLQKTELEGHDKTK  
 Worm 194 AOSOE-----NLDDLEKTVONLKVETELKPKHERFDNFENRMKIAEKRVESLSSNLSK

Capsaspora 432 QNLAKSEKLAESKEETA AVRAT---YTSTLQ-SLQOTEKTKQOELEQRDREVSEHKAKL  
 Choano 210 PGVANQPDSDATAQEEAEQRKGTVRECESTIK-QLKAT---ADQARTDLEVAQGDVAAL  
 Fly 284 RKLEEEK-----NAPNKLEEK--ANEKLMFEANTI-----LLKHE-----  
 Fugu 511 EKLRETTSKLTOAKEETEQIRKN---CQDMIR-TYQEEELKSNELDAKLRETKGELEKH  
 Human 411 DKLKETTTLKTOAKEEADQIRKN---CQDMIK-TYQEEEEKSNELDAKLRVTKGELEKQ  
 Hydra 314 KQISILTAKLQESKEEGSQIRQN---CQEMIE-RYQANEEIESVRLKIEAKEKDQRINEY  
 Rat 435 DKLKETTTLKTOAKEEAEQIRSN---CQDMIK-TYQEEEEKSNELDAKLRVTKGELEKQ  
 Sponge 241 SOLAATAKLLKOTKEESDQIRSD---LKKMIS-EYQEEEMRNSLQVKKLKKTEEBELRQQ  
 Worm 247 QOGDMLRKOLIQAKDDKHILQ-----QYEVKLOTSTAELEERRLRESEHDVERL



Capsaspora 488 ---ERGQTESDLLWGRIKDATTLAETNAQQQFAQAQQTNTSMQQQIEQERETVTMLDNK  
Choano 265 ---RQEIIVDLKLRADWATNNLEEARQ-----DAGSARDAMRKAQQEIKAEKEV  
Fly 319 ---IT---SKTEALDKLTKE-----QOKLSAANKELQNOIQEITTEHNQIT---  
Fugu 567 ---KQEQTDQLEVHRVKSKE-----LEDLKRYSYKESIDELRTTKLKCIEDER  
Human 467 ---MOEKSDQLEMHHAKIKE-----LEDLKRFTFKEGMDERTRTKVKCKIEDER  
Hydra 370 REIIESFNKKEEQYKAQIKI-----LE---RKSNDILEENLQYKDMVLKLNENN  
Rat 491 ---MOEKSDQLEMHHAKIKE-----LEDLKRFTFKEGMDERTRTKTKCKIEDER  
Sponge 297 ---EQEIAQQQQLLELTVKD-----LEINQASLEIANKEIQQLKNKVIHFENT-  
Worm 295 ---RT-----SQLE-MAT---KFEASRENTDLLSKIDILQDQLSLEEDRR

Capsaspora 544 KLLSERVNV-----TLELVQATKFFELDSKLL---DANAKIQ  
Choano 311 QRLRTAIDKEQKAM-----ADRLDTLTKAKSESQALASRLA---EIEQKHIE  
Fly 359 ---EENRRLRELHNSVEGSYDELLNSAKLRGQLEELQLRTQNTINEEKLMDDQQRV  
Fugu 613 PRWEDELISKYREIINRQKAE-I-----GRQEKVDEVTAEQHQQRDKQEVASIREEVE  
Human 513 LRTEDELISKYKEIINRQKAE-I-----QNLLDKVKTADQLQEQQLRGKQEIENLKEEVE  
Hydra 416 LSLENINNEKEKDCAEKCK-I-----DELNDKLEVLNNIKDNCNTRLEKELLDQLQDQ  
Rat 537 LRTEDELISKYREIINRQKAE-I-----QNVWDKVKAAQQLQEQQLYSGKQEIENLKEEVE  
Sponge 342 LEKQEEIDRMKVENAREKKE-Q-----QKLLNEKTAIQDMNKDIEKERLDYAAIKESHT  
Worm 334 KLCSEQIDRLKGVESFVSS-S-----H-----RIEETEKERE

Capsaspora 576 GIEGTISTIEQNLTTANATIVALETDKQALETETVSTMTEEAATTAATLQEVGTGRDRLOA  
Choano 354 SVVAEKNSIVOHNSQ-----LKTTLIEDMRLQL--DOTORESIEEQTKIQEQLAELEQ  
Fly 415 KIEALVQDMETDLEQLKVKRQELLTINKEMSELIVQLONDI CLAKAKAQQGLDAE-NKLLK  
Fugu 666 CLTNQMADYQHDVQGSREREAELLGFTTEKLSKNAQLOSESNAQALQDQLTSSFAELOA  
Human 566 SINSLINDIQKDIEGSRKRESILLFTERTLSKNAQLOSESNSIQSQFDKVCSESQLOS  
Hydra 469 INKKHINEENIEAFYKEKQOELMAYTQSLTENNVASKSVAELHAKQIEKE---DTLVK  
Rat 590 SINSLINDIQKDIEGSRKRESILLFTTEKLSKNAQLOSESASSLOAVDSISCESQLOS  
Sponge 395 HLQKTAQHIREVRSRRKKEAELLTFSDKMSSLNAELRTERDSLEQSVIQLE---NKLLK  
Worm 366 TAEEDREQALEAAEYREQVEKMLKLTQELTERNMELQRKLDKEEGKNTSHNSTIEKLOV

Capsaspora 636 T-----LE-----ERDAKISDIEEQVSQLTATHAELOQAYATAVHDHETAITSNE  
Choano 405 A-----LE-----DMTQAKAELALALEDERASATS EATYLT-----GQINEELO  
Fly 474 Q-----EKL-----TYDTKYNQIEQQLSLEASEKNERLLIA-----KHISEKTK  
Fugu 726 R-----LEGTT-----ELLDEKSRQLKQEEGIRROEVEGLQ-----EERTALQR  
Human 626 Q-----CEQMK-----QTNINIESRLKKEEELRKEEVQTLQ-----AETACRQT  
Hydra 526 Q-----SLLIS-----EKEAEIELLVNQRNEEL-HQVDEIK-----KTLIDQKNF  
Rat 650 Q-----CEHMK-----QTNGDLESRLKKEEELRKEEVQSLQ-----AELSAVQT  
Sponge 452 E-----VDNNE-----MIEGKLKEMADKQLQVERSCHKINSIM-----QALQDKSK  
Worm 426 ELTTSLELCKSFEEENLKISEELENKTEMOKPVTLESLENFYR-----DKYDEASR

Capsaspora 682 QIQELTTKADGEVDKQILHRKMAAQKDFAKOLKIAQKRAADLDNP-----  
Choano 444 QRQDMQQKTRDLEESIRLQKQKHAHTTRDMAKQLSQAQKKLASLSRQ-----  
Fly 514 MYELTKQKLEEDVQGDFEATQKHAATVLRKELHRELNRYKRGITEPKTPI SYCSNCQQAING  
Fugu 765 EVAQSNIRIEELKDELVTQRRKQANIKDLTKOLTQVRKRLEQVENC-----  
Human 665 EVKALSTQVEELKDELVTQRRKHASSIKDLTKQLQQARRKLDQVESG-----  
Hydra 564 SVIELSDLINQANDDLKIKKKNAAQLKDLQKHLVTTKIDKLESG-----  
Rat 689 EARALSTQVEELKDELVTQRRKHASNVKDLKSKOLQQARRKLDQTEG-----  
Sponge 494 AVEQLSVSIEEREQMVAIKRRKHLNNIKDMQRQIQLYSKRIEQLEAS-----  
Worm 479 KLEQTEAKLAEKKNFSAFKKTSATLKEKSELKSGYRKNNGAGDSG-----

Capsaspora 729 -TAPHSPYSGSSLGRQS-----SFSSMSRTSEFTSSV PATPSH--HHPG  
Choano 491 -PEED-AQSVASTGSMVDEPLHSPSNSSIHSR-DMNSMGGMGPTVSM LPATPEP-----  
Fly 574 YPTENPQRS--HSRSSSHG-----SMHSGSRR-----ASES-----  
Fugu 812 -GCDRDASSM--GSRSSSSGTTPGF-----GSLNARHGG--NGGVEE----  
Human 712 -SYDKEVSSM--GSRSSSSG-----SLNARSS-----AED-----  
Hydra 611 -STENLH--A--KSNISSNG-----SLEKLLSNPQ-----SSS----  
Rat 736 -NYDKDVSSM--GSRSSSSG-----SLNARSS-----AED-----  
Sponge 541 -TQSD-VATL--PVTSSGHM----TSGHMMR-SAHSHGSLDGSLNNIPLTNQTHST---  
Worm 526 -AALGA-HVL--APPTSSDP-----SMSSRSRASSITSIDRV-----TS---



|            |     |                           |                                     |
|------------|-----|---------------------------|-------------------------------------|
| Capsaspora | 770 | LHDGYNGGSQRTSMLIEEDSVPPSP | SHNGR-P-----G---SMVIDDNTSE          |
| Choano     | 542 | -----LQPAPRTA-----        | -----EVS-----                       |
| Fly        | 604 | -----S-----               | ESETV-A-S-----SATTVQQPPPO           |
| Fugu       | 849 | -----R-----               | SPDGQMG-P-----SVVVVD-HF--           |
| Human      | 739 | -----R-----               | SPENT-G-----SSVAVD-NF--             |
| Hydra      | 640 | -----D---PLMISDDHYISQPR   | -----RG-----QNRSVG--                |
| Rat        | 763 | -----R-----               | SPENT-S-----SSVAVD-NF--             |
| Sponge     | 588 | -----SLTPNRMSPDNFIPSP     | QLOSSSPSHMHTVQGGGVSTGGG-VAAGIGL---- |
| Worm       | 561 | -----T-----               | SREEEVS-S-----AAGEEAKRIEN----       |

|            |     |                                |                                                |
|------------|-----|--------------------------------|------------------------------------------------|
| Capsaspora | 812 | M-SVLEEDNKLFLQ-RVVDLQKRLDRRE   | EKVSFLEDEAKALTDQVAQKTKILOHYFARED               |
| Choano     | 553 | --TAPSGLASLFGSRR               | RAGEKQGPQORLOAKVDFLESEVNELTESIKNKNKLLQOQYFLREK |
| Fly        | 623 | QDLQAVPSKRVLVE-RILRLQOQATARQ   | TERIEFLENETAALVAEVQKSKVVOHYMLRDO               |
| Fugu       | 866 | ----PEVDKSVLVD-RIVRLQKALARKQ   | EKIEFMEDHIKOLVEEIRKTKIIQSYVLRRE                |
| Human      | 754 | ----PQVDKAMLIE-RIVRLQKAHARKNE  | KIEFMEDHIKOLVEEIRKTKIIQSYVLRRE                 |
| Hydra      | 663 | ----DIEIDKQVLIE-RICKLQRIHAKRNE | KIDFLNEHILHLTEDLQKKTRIIQFFLHKEE                |
| Rat        | 778 | ----PEVDKAMLID-RIVRLQKAHARKNE  | KIEFMEDHIKOLVEEIRKTKIIQSYVLRRE                 |
| Sponge     | 635 | F-QTLDHEKTVLVD-KLCQMKRQLAKKE   | EKIEFYEGEVQOLTEDIKSKSRLLIQHFIMREE              |
| Worm       | 581 | -EEQKLNMQIMID-KIVLQKRLARRTEK   | CEFLIEEVRQCLEELQKTKIIQHFALREE                  |

1 2

|            |     |                             |                                        |
|------------|-----|-----------------------------|----------------------------------------|
| Capsaspora | 870 | -MGTLTPEKFDYDR-----         | EORSKSK---GMMASMFGS-----KQDSTITLTL     |
| Choano     | 611 | -MCHLASPSTGASQ-----         | POSSSAS---ARFKALLGA-----NLQOQ-HQAV     |
| Fly        | 682 | TAGALTTSRSDQNK-----         | SELVYKG--NGIMAAIYGGGSSK--TGGENKAMSLEL  |
| Fugu       | 921 | -SGALSSEASDINK-----         | VQLSRRG---GIMASLYTS-----HPADSGLTLDL    |
| Human      | 809 | -SGTSSSEASDFNK-----         | VHLSRRG---GIMASLYTS-----HPADNGLTLEL    |
| Hydra      | 719 | -AGSLSPNLSDKIK-----         | AKVSQEG---GVMASVYSA-----RPNDKAMTLEL    |
| Rat        | 833 | -SGTSSSEASDFNK-----         | VHLSRRG---GIMASLYTS-----HPADSGLTLEL    |
| Sponge     | 693 | -AGALIPPEADANK-----         | EQLSRRS---SSSIMGTVFKGGGVGGGASHKQAEMLEL |
| Worm       | 639 | -ASLLMPSEGSLKLFANCEFVQVPIGR | KSAAYALMGAMFTS-----SGNEK-KQVOI         |

3

|            |     |                              |                              |
|------------|-----|------------------------------|------------------------------|
| Capsaspora | 910 | CLEMNKRFOSLLEDMTLKNIRLQESMDT | MGAEVARIQGLLGVGDEPRTPDYATRFP |
| Choano     | 650 | TQEAMAKLQEVLEDTMLQNI         | ALKETIDALT-----              |
| Fly        | 729 | SLEINRKKLQAVLEDTLKNI         | TLKENLDVGLQVDNITRKLK-----    |
| Fugu       | 961 | SLEINRKKLQAVLEDTLKNI         | TLKENLQTLGAEIERLIKQO-----    |
| Human      | 849 | SLEINRKKLQAVLEDTLKNI         | TLKENLQTLGTEIERLIKHO-----    |
| Hydra      | 759 | SLQINNKLQAVLEDTLKNI          | MLKENLDTLGSEIDKLNEM-----     |
| Rat        | 873 | SLEINRKKLQAVLEDTLKNI         | TLKENLQTLGTEIERLIKHO-----    |
| Sponge     | 742 | SLEINRKKLQAVLEDTLKNI         | TLKESLNTLQGEVARLSAQIP-----   |
| Worm       | 690 | MTEVNSRLQAVLEDVIQKNILMRSSVD  | TLSADNTRLSREN-----           |

3

|            |      |                               |                                 |
|------------|------|-------------------------------|---------------------------------|
| Capsaspora | 970  | VLETASAPSTPARHPANEIPAQSLTDSAS | VLTVTDAARVPSSREHPHVDVSHPDSVEIVL |
| Choano     | 680  | -----                         | -----                           |
| Fly        | 770  | -----                         | -----                           |
| Fugu       | 1001 | -----                         | -----                           |
| Human      | 890  | -----                         | -----                           |
| Hydra      | 799  | -----                         | -----                           |
| Rat        | 914  | -----                         | -----                           |
| Sponge     | 783  | -----                         | -----                           |
| Worm       | 731  | -----                         | -----                           |

|            |      |                             |                                   |
|------------|------|-----------------------------|-----------------------------------|
| Capsaspora | 1030 | TTATPLADAPVDLSLAAPAADDNASVP | VADLAPEQASVPVADLAPEQDSAQEPAAVEPAV |
| Choano     | 680  | -----                       | -----                             |
| Fly        | 770  | -----                       | -----                             |
| Fugu       | 1001 | -----                       | -----                             |
| Human      | 890  | -----                       | -----                             |
| Hydra      | 799  | -----                       | -----                             |
| Rat        | 914  | -----                       | -----                             |
| Sponge     | 783  | -----                       | -----                             |
| Worm       | 731  | -----                       | -----                             |

|                 |      |                                                              |
|-----------------|------|--------------------------------------------------------------|
| Capsaspora      | 1090 | AEQAPVEQAPVEPAAVEPAAVEPAAAAPEPAAAAEQPAPVEAPALESSPAEDQPIQQADA |
| Choanoflagellat | 680  | -----                                                        |
| Fly             | 770  | -----                                                        |
| Fugu            | 1001 | -----                                                        |
| Human           | 890  | -----                                                        |
| Hydra           | 799  | -----                                                        |
| Rat             | 914  | -----                                                        |
| Sponge          | 783  | -----                                                        |
| Worm            | 731  | -----                                                        |

|                 |      |                                                               |
|-----------------|------|---------------------------------------------------------------|
| Capsaspora      | 1150 | PEIAPDSTIAAEPLPEQASDEAQPDPANPVTDAAAESAPLPDAVPAEETTPDVPSQDE--- |
| Choanoflagellat | 680  | -----                                                         |
| Fly             | 770  | -----SL---                                                    |
| Fugu            | 1001 | -----                                                         |
| Human           | 890  | -----EL---                                                    |
| Hydra           | 799  | -----                                                         |
| Rat             | 914  | -----EL---                                                    |
| Sponge          | 783  | -----K---                                                     |
| Worm            | 731  | -----LLSLS                                                    |

|                 |      |                 |
|-----------------|------|-----------------|
| Capsaspora      | 1207 | -ASEDSL         |
| Choanoflagellat | 680  | -----KA         |
| Fly             | 772  | ---EGSCK        |
| Fugu            | 1001 | -----RS         |
| Human           | 892  | -EQRTKKT        |
| Hydra           | 799  | ---RSSKK        |
| Rat             | 916  | -EQRTKKA        |
| Sponge          | 784  | -NTSTSNR        |
| Worm            | 736  | <u>QVRTTQDN</u> |

-  CC3 fragment
-  Predicted Coiled-Coil domains
-  Predicted Amphipathic helix

Figure S4

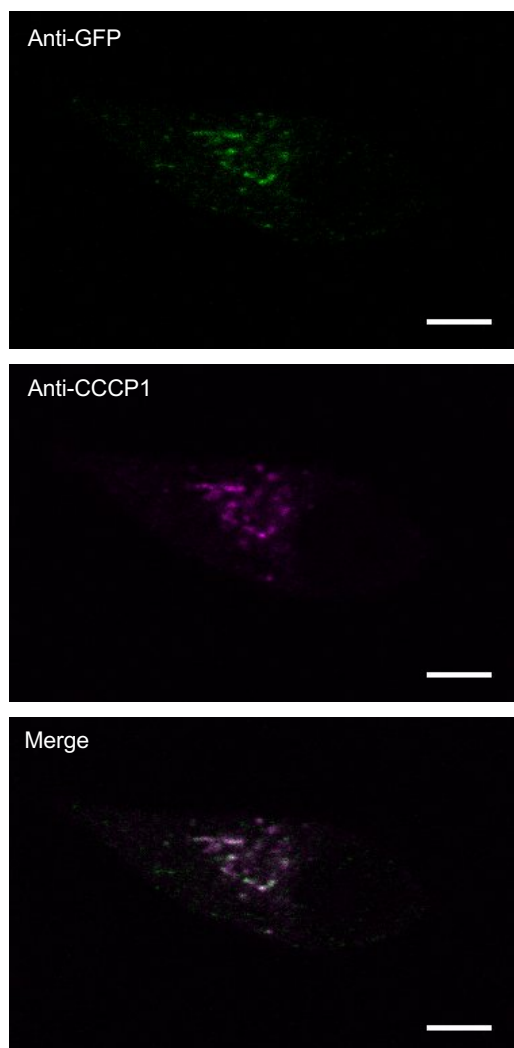

Supplement: NIHMS896203-supplement-Supp_Info.pdf [file NIHMS896203-supplement-Supp_Info.pdf]
